# Supplementary material for: The Anti-Inflammatory Mechanism of Flaxseed Linusorbs on Lipopolysaccharide-Induced RAW 264.7 Macrophages by Modulating TLR4/NF-κB/MAPK Pathway
Source: MDPI journal article supplement (doi:10.3390/foods12122398), 2023-06-16
Supplement: s1 [file s1]

Supplementary Materials

Table S1. Structural features of FLs monomers.

|                        | FLA                                                                               | FLE                                                                               | FLC                                                                                | FLG                                                                                 | FLP                                                                                 | FLM                                                                                 |
|------------------------|-----------------------------------------------------------------------------------|-----------------------------------------------------------------------------------|------------------------------------------------------------------------------------|-------------------------------------------------------------------------------------|-------------------------------------------------------------------------------------|-------------------------------------------------------------------------------------|
| Structural formula     | 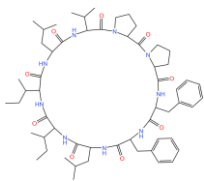 |  |  |  |  |  |
| Molecular formula      | C <sub>57</sub> H <sub>85</sub> N <sub>9</sub> O <sub>9</sub>                     | C <sub>51</sub> H <sub>76</sub> N <sub>8</sub> O <sub>9</sub> S                   | C <sub>56</sub> H <sub>83</sub> N <sub>9</sub> O <sub>10</sub> S                   | C <sub>56</sub> H <sub>75</sub> N <sub>9</sub> O <sub>10</sub> S <sub>2</sub>       | C <sub>51</sub> H <sub>76</sub> N <sub>8</sub> O <sub>8</sub> S                     | C <sub>56</sub> H <sub>75</sub> N <sub>9</sub> O <sub>8</sub> S <sub>2</sub>        |
| Molecular weight       | 1040.3                                                                            | 977.3                                                                             | 1074.4                                                                             | 1098.4                                                                              | 961.3                                                                               | 1066.4                                                                              |
| Amino acid composition | Ile-Leu-Val-Pro-Pro-Phe-Phe-Leu-Ile<br>FLL                                        | MetO-Leu-Val-Phe-Pro-Leu-Phe-Ile<br>FLF                                           | MetO-Leu-Ile-Pro-Pro-Phe-Phe-Val-Ile<br>FLH                                        | MetO-Leu-MetO-Pro-Phe-Phe-Trp-Ile<br>FLO                                            | Met-Leu-Val-Phe-Pro-Leu-Phe-Ile<br>FLB                                              | Met-Leu-Met-Pro-Phe-Phe-Trp-Ile<br>FLN                                              |
| Structural formula     |  |  |  |  |  |  |
| Molecular formula      | C <sub>55</sub> H <sub>73</sub> N <sub>9</sub> O <sub>8</sub> S <sub>2</sub>      | C <sub>55</sub> H <sub>73</sub> N <sub>9</sub> O <sub>10</sub> S <sub>2</sub>     | C <sub>56</sub> H <sub>75</sub> N <sub>9</sub> O <sub>9</sub> S <sub>2</sub>       | C <sub>57</sub> H <sub>77</sub> N <sub>9</sub> O <sub>8</sub> S                     | C <sub>56</sub> H <sub>83</sub> N <sub>9</sub> O <sub>9</sub> S                     | C <sub>56</sub> H <sub>75</sub> N <sub>9</sub> O <sub>9</sub> S <sub>2</sub>        |
| Molecular weight       | 1051.5                                                                            | 1084.4                                                                            | 1082.4                                                                             | 1048.3                                                                              | 1058.4                                                                              | 1082.4                                                                              |
| Amino acid composition | Met-Leu-Met-Pro-Phe-Phe-Trp-Val                                                   | MetO-Leu-MetO-Pro-Phe-Phe-Trp-Val                                                 | MetO-Leu-Met-Pro-Phe-Phe-Trp-Ile                                                   | Met-Leu-Leu-Pro-Phe-Phe-Trp-Ile                                                     | Met-Leu-Ile-Pro-Pro-Phe-Phe-Val-Ile                                                 | Met-Leu-MetO-Pro-Phe-Phe-Trp-Ile                                                    |
